# Supplementary material for: Synthesis of a hierarchical SiO2/Au/CeO2 rod-like nanostructure for high catalytic activity and recyclability
Source: Royal Society of Chemistry journal article supplement (doi:10.1039/c5ra04491j), 2015-01-01
Supplement: c5ra04491j1.pdf [file c5ra04491j1.pdf]

## Supporting Information

### Synthesis of hierarchical $\text{SiO}_2/\text{Au}/\text{CeO}_2$ rod-like nanostructure for high catalytic activity and recyclability

Table S1. Characteristics of BET of the  $\text{SiO}_2/\text{Au}$  and  $\text{SiO}_2/\text{Au}/\text{CeO}_2$ .

| Samples                               | BET surface area<br>( $\text{m}^2/\text{g}$ ) | Pore diameter<br>(nm) | Pore volume<br>( $\text{cm}^3/\text{g}$ ) |
|---------------------------------------|-----------------------------------------------|-----------------------|-------------------------------------------|
| $\text{SiO}_2/\text{Au}$              | 21                                            | 18.53                 | 0.18                                      |
| $\text{SiO}_2/\text{Au}/\text{CeO}_2$ | 110                                           | 5.03                  | 0.14                                      |

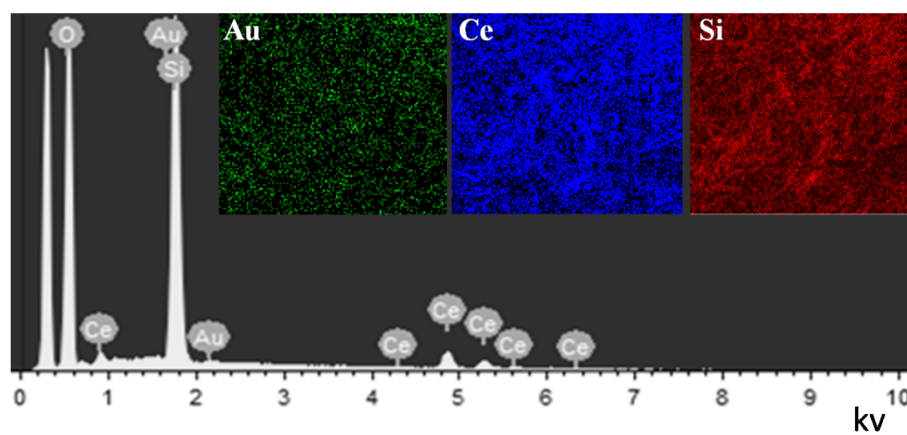

Fig. S1 EDX analysis of  $\text{SiO}_2/\text{Au}/\text{CeO}_2$  and the inset are the EDX mapping analysis of the Au, Ce and Si.

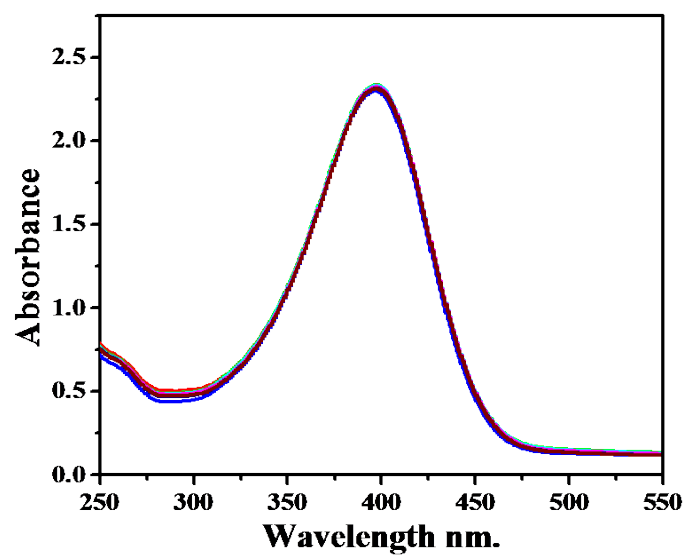

Figure S2. The solution without catalyst.

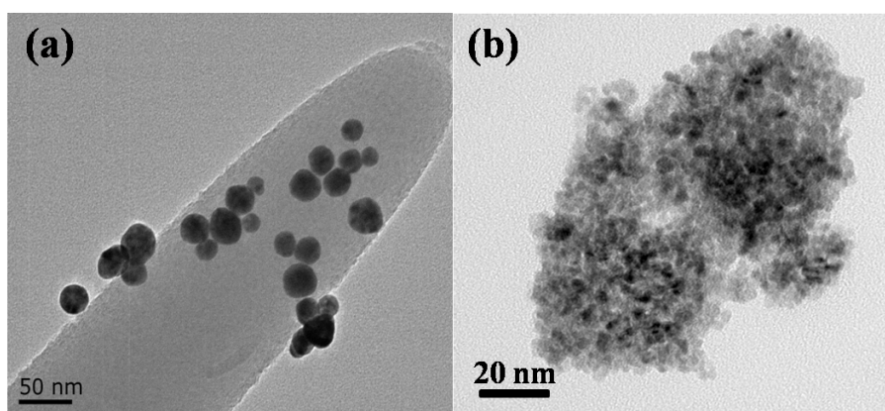

Figure S3. (a) TEM image of SiO<sub>2</sub>/Au after calcination progress, (b) traditional noble metal supported CeO<sub>2</sub>/Au catalyst.

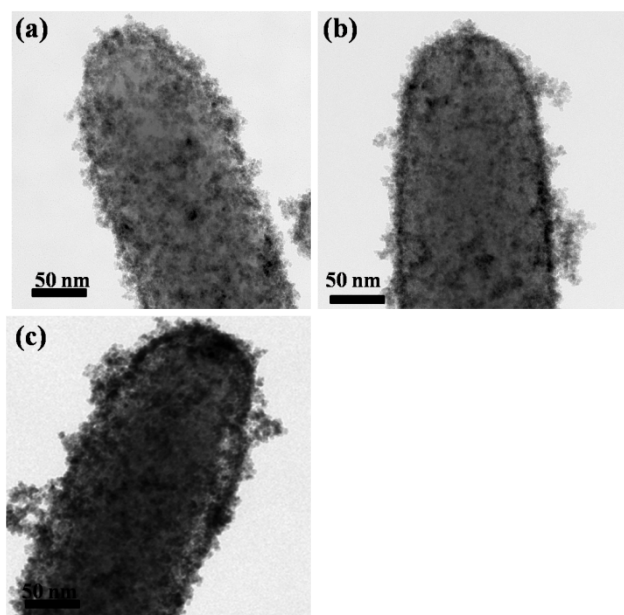

Figure S4. TEM image of (1)  $\text{SiO}_2/\text{Au}/\text{CeO}_2$  (0.05) (2)  $\text{SiO}_2/\text{Au}/\text{CeO}_2$  (0.1) (3)  $\text{SiO}_2/\text{Au}/\text{CeO}_2$  (0.15).

Fig. S4a indicated that when  $\text{Ce}(\text{NO}_3)_3 \cdot 6\text{H}_2\text{O}$  feeding amount about 0.05g, there have many small nanoparticles attached on the surface of the spheres and the surface was covered but not entirely covered with  $\text{CeO}_2$  nanoparticles. They are coexistence in the surface of  $\text{SiO}_2/\text{Au}$  side by side. With increasing the feeding amount, the TEM image in Fig. S4b and c shows that  $\text{Au}/\text{SiO}_2$  rode was coated by a dense  $\text{CeO}_2$  layer and metal nanocatalysts are covered by porous shells, the layer coated on  $\text{CeO}_2$  spheres becomes thicker with increasing the amount of  $\text{Ce}(\text{NO}_3)_3 \cdot 6\text{H}_2\text{O}$ . However, too much  $\text{CeO}_2$  nanoparticles will affect the diffusion of reactant in the macroporous materials and may influence the reaction activity.
